# Supplementary material
Source: PubMed Central journal article supplement (PMC3927553)
Supplement: NIHMS503019-supplement-01.pdf [file NIHMS503019-supplement-01.pdf]

Fig. S1

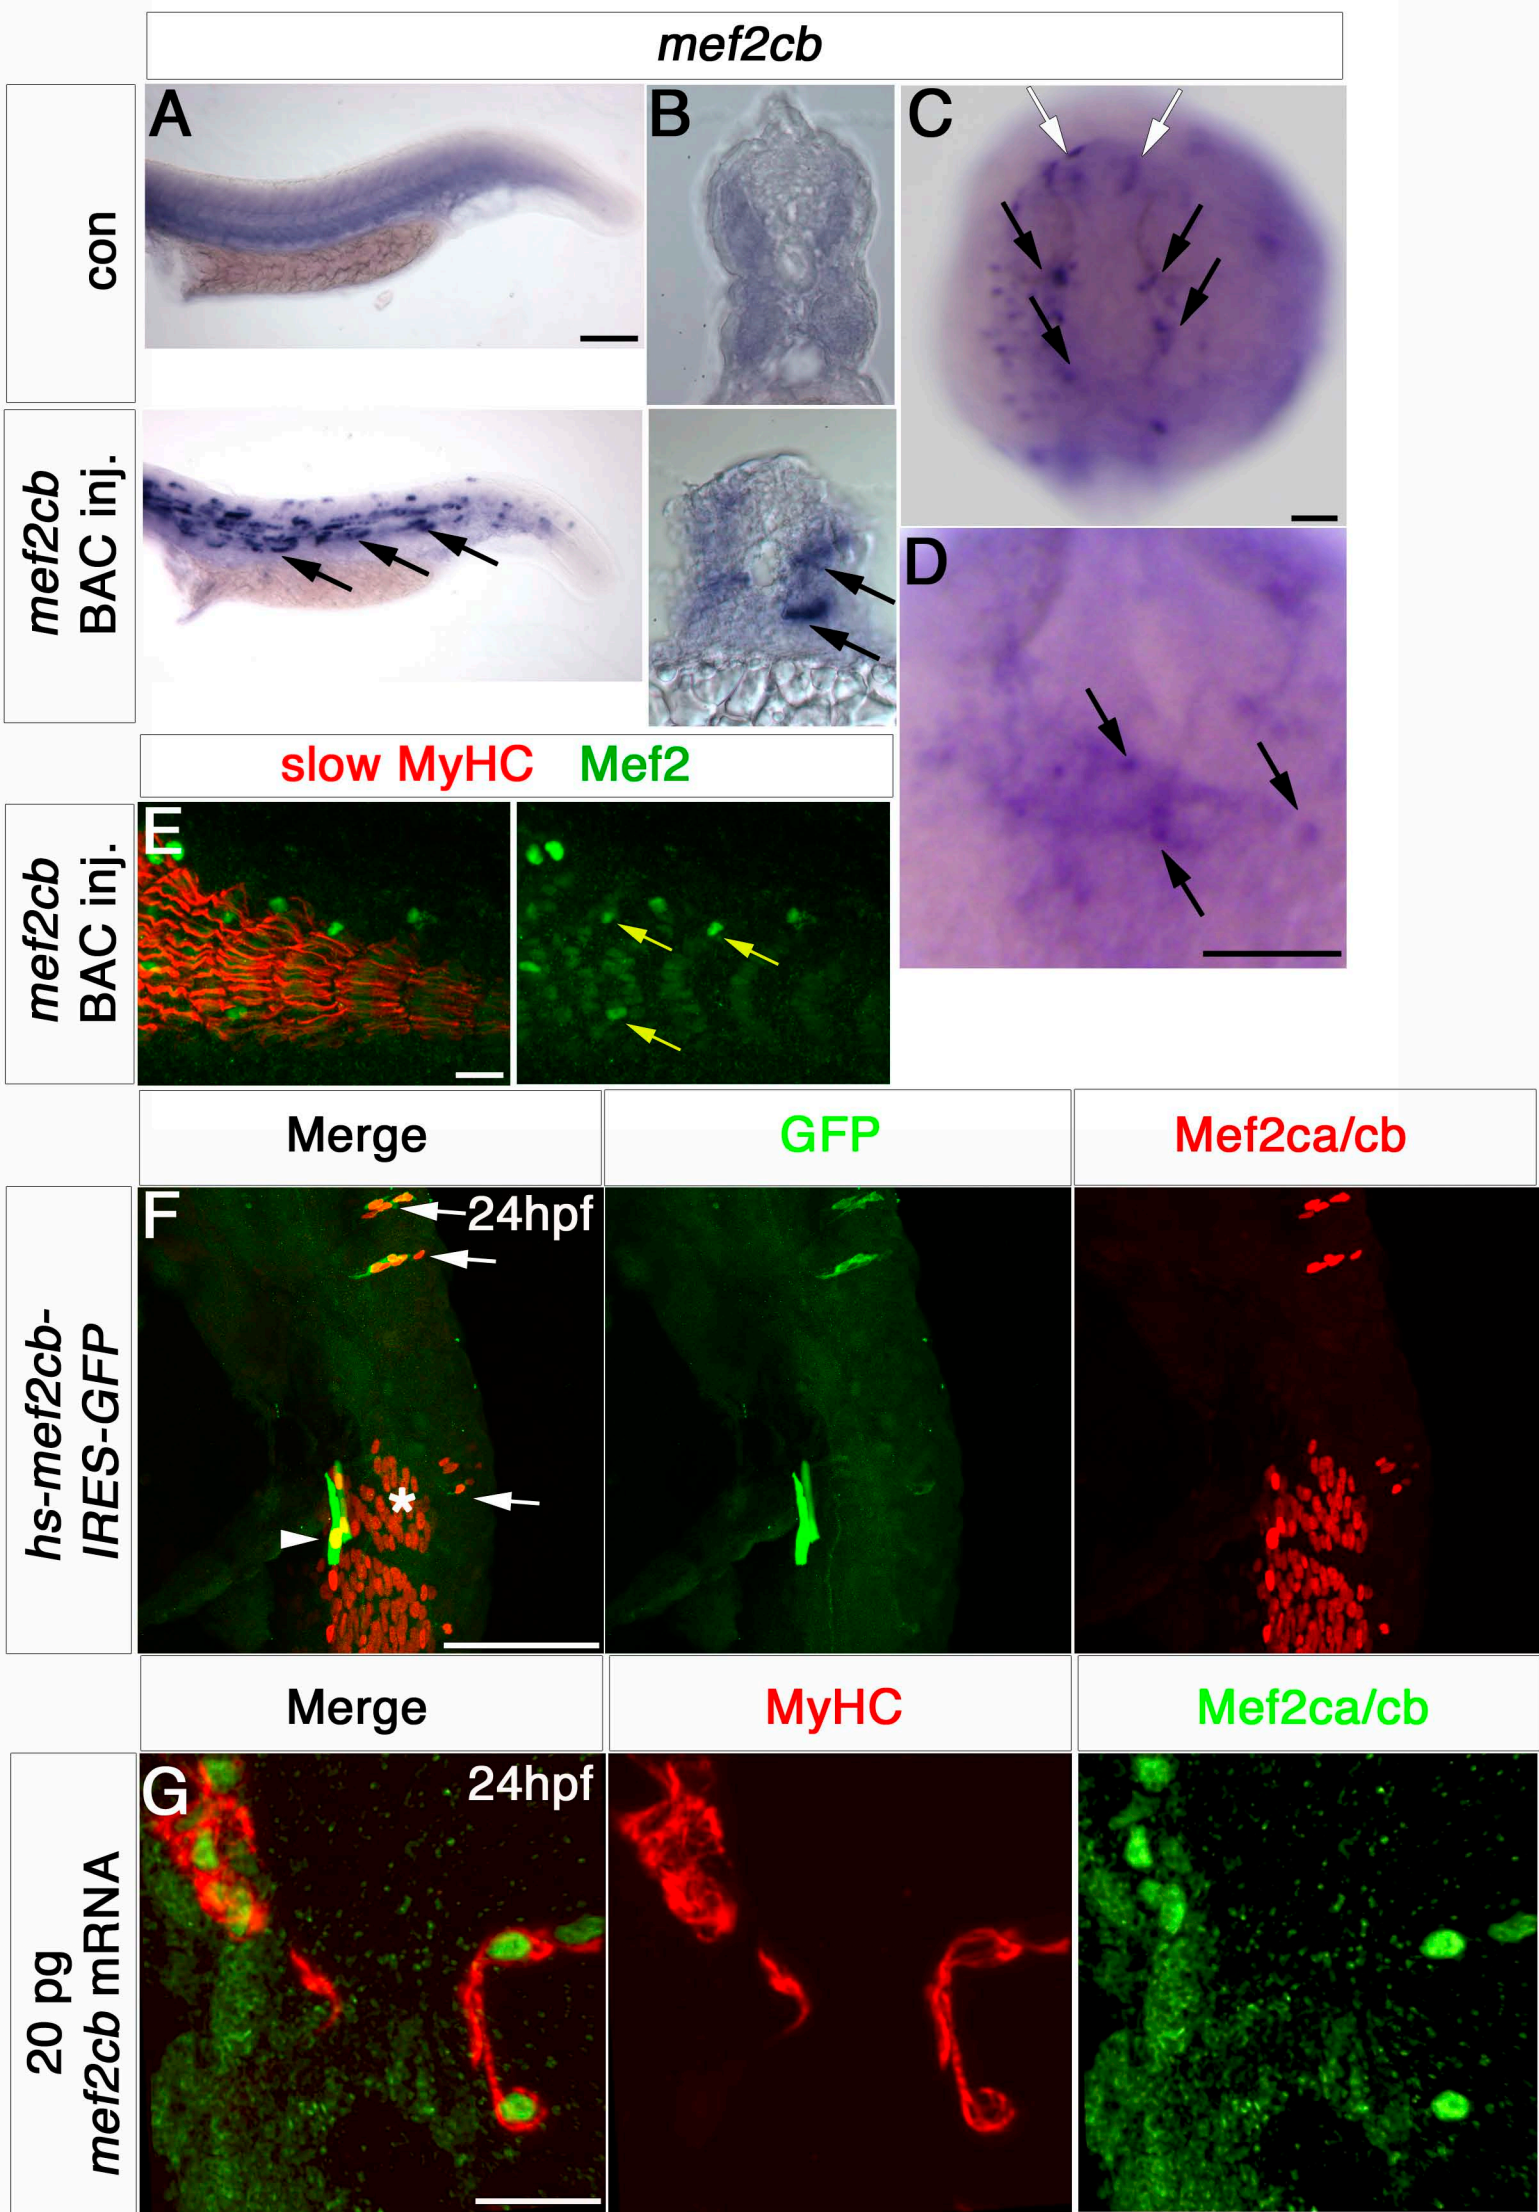

Fig. S2

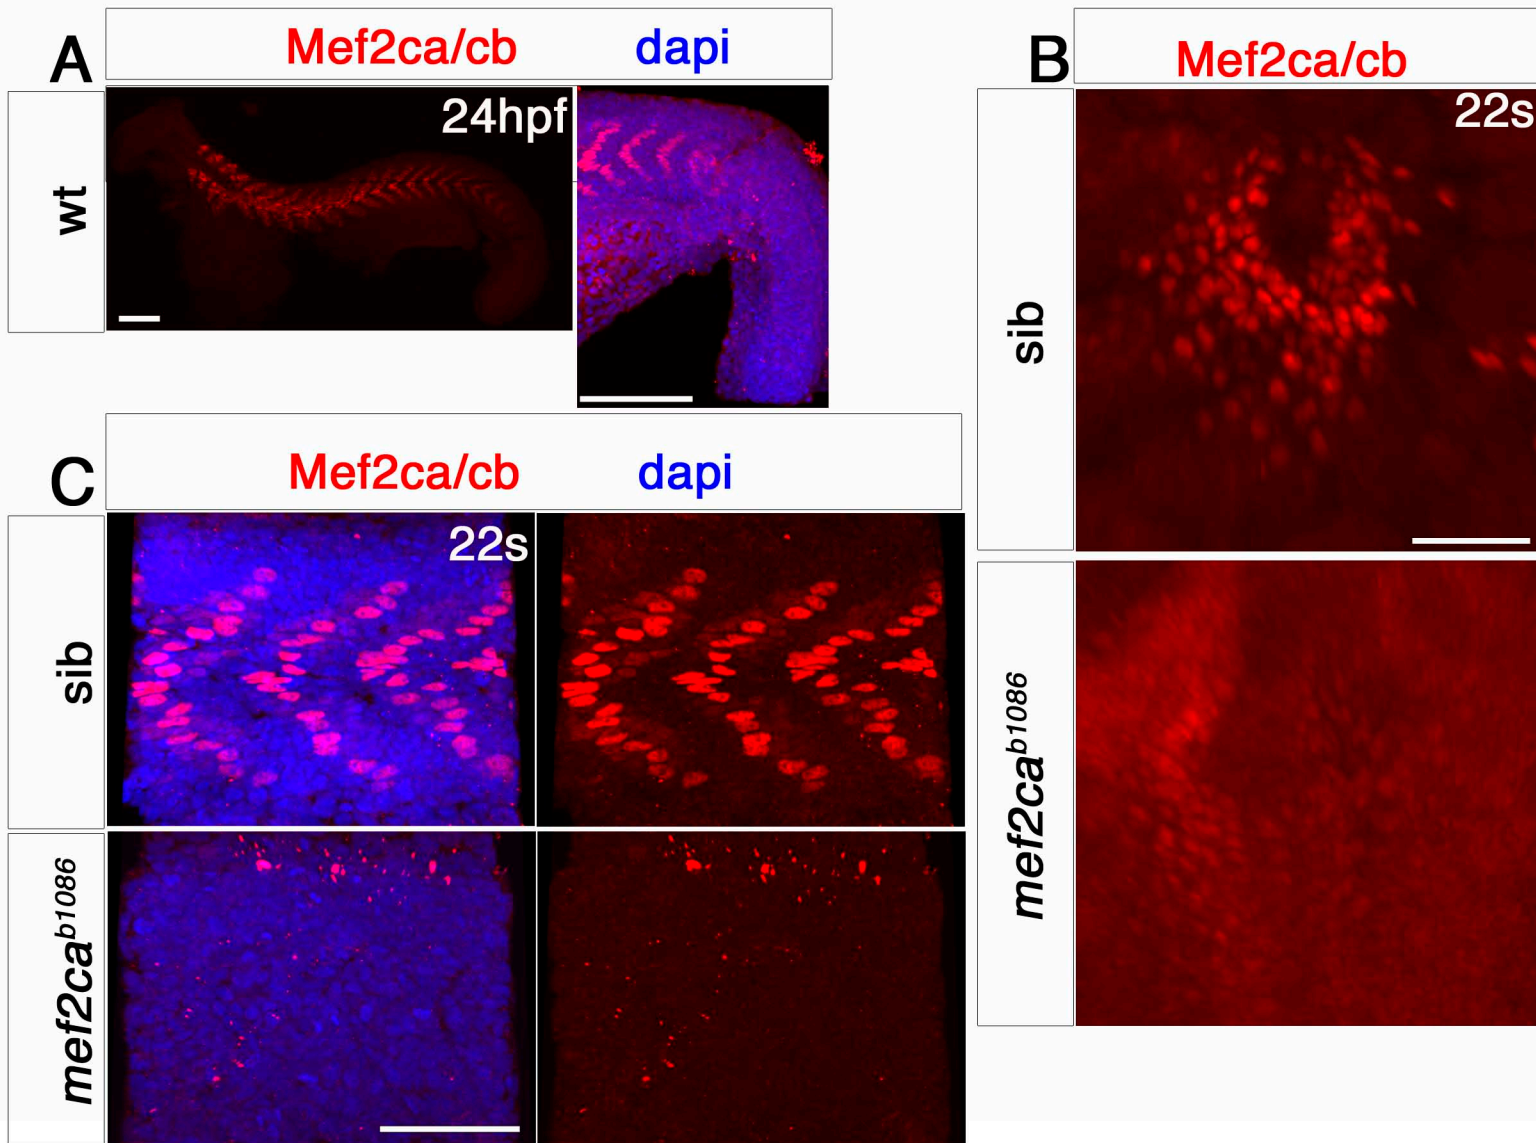

Fig. S3

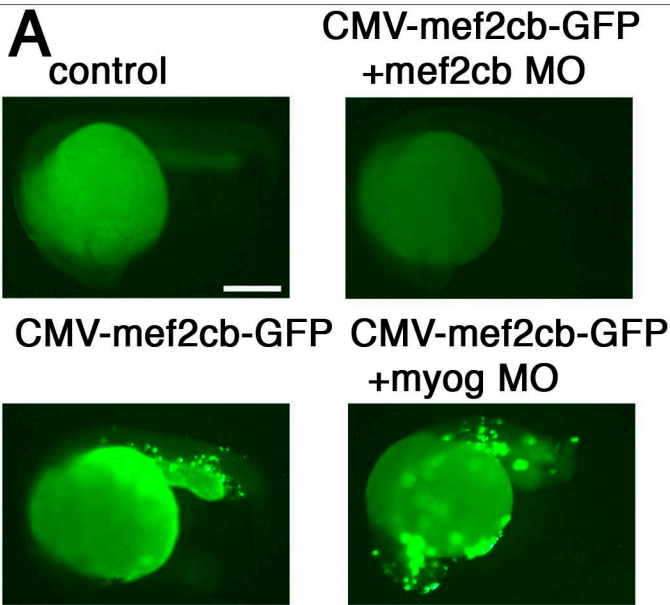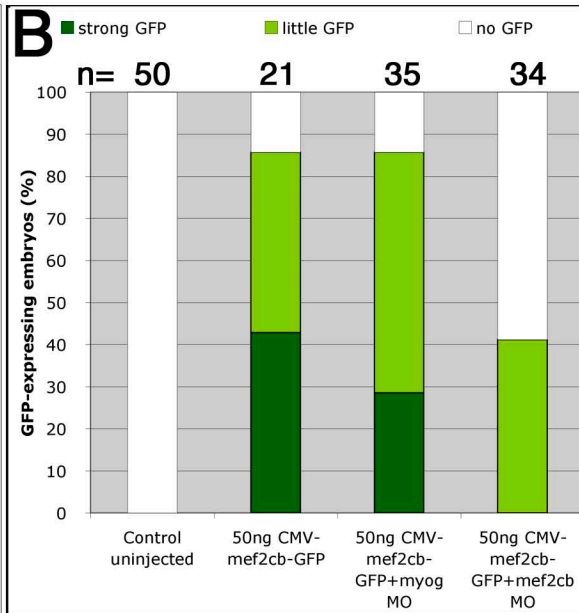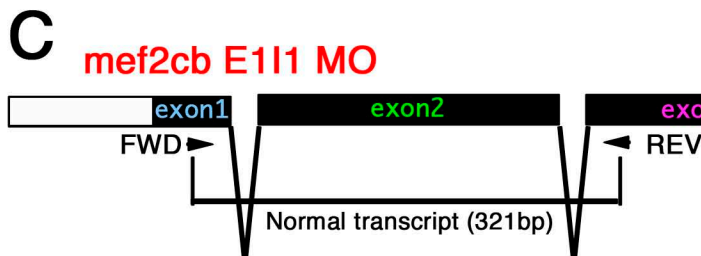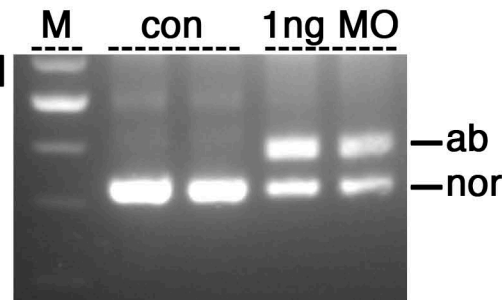

aberrant transcript (403bp):

CACACGGATTATGGATGAACGCAACAGACAGgtgagtcacgctgaccggaaggagccgaagaacacttccttcacacaag

--T--R--I--M--D--E--R--N--R--Q--V--S--H--A--D--R--K--E--P--K--N--T--S--F--T--Q--

cttgatgggttggttttagacagaaatagatcaaGTGACATTTACAAAGAGAAAGTTTGGCCTGATGAAGAAAGCCTACGA

A--\*--

GCTGAGCGTGTGTGTGACTGTGAGATTGCCCTGATCATCTTCAACAGACCAACAAGCTGTTCCAGTACGCCAGCACAG

ATATGGACAAAGTCTGCTCAAATACACAGAGTACAACGAGCCACACGAGAGCAGGACCAACTCGGACATAGTGGAGACC

CTGAGAAAGAAGGGTCTAAATGGCTGTGACAGCCCGACCCCGACGCCGACTCGGTGGGCCACAGCCCAGAGTCAA

GGA



Fig. S4

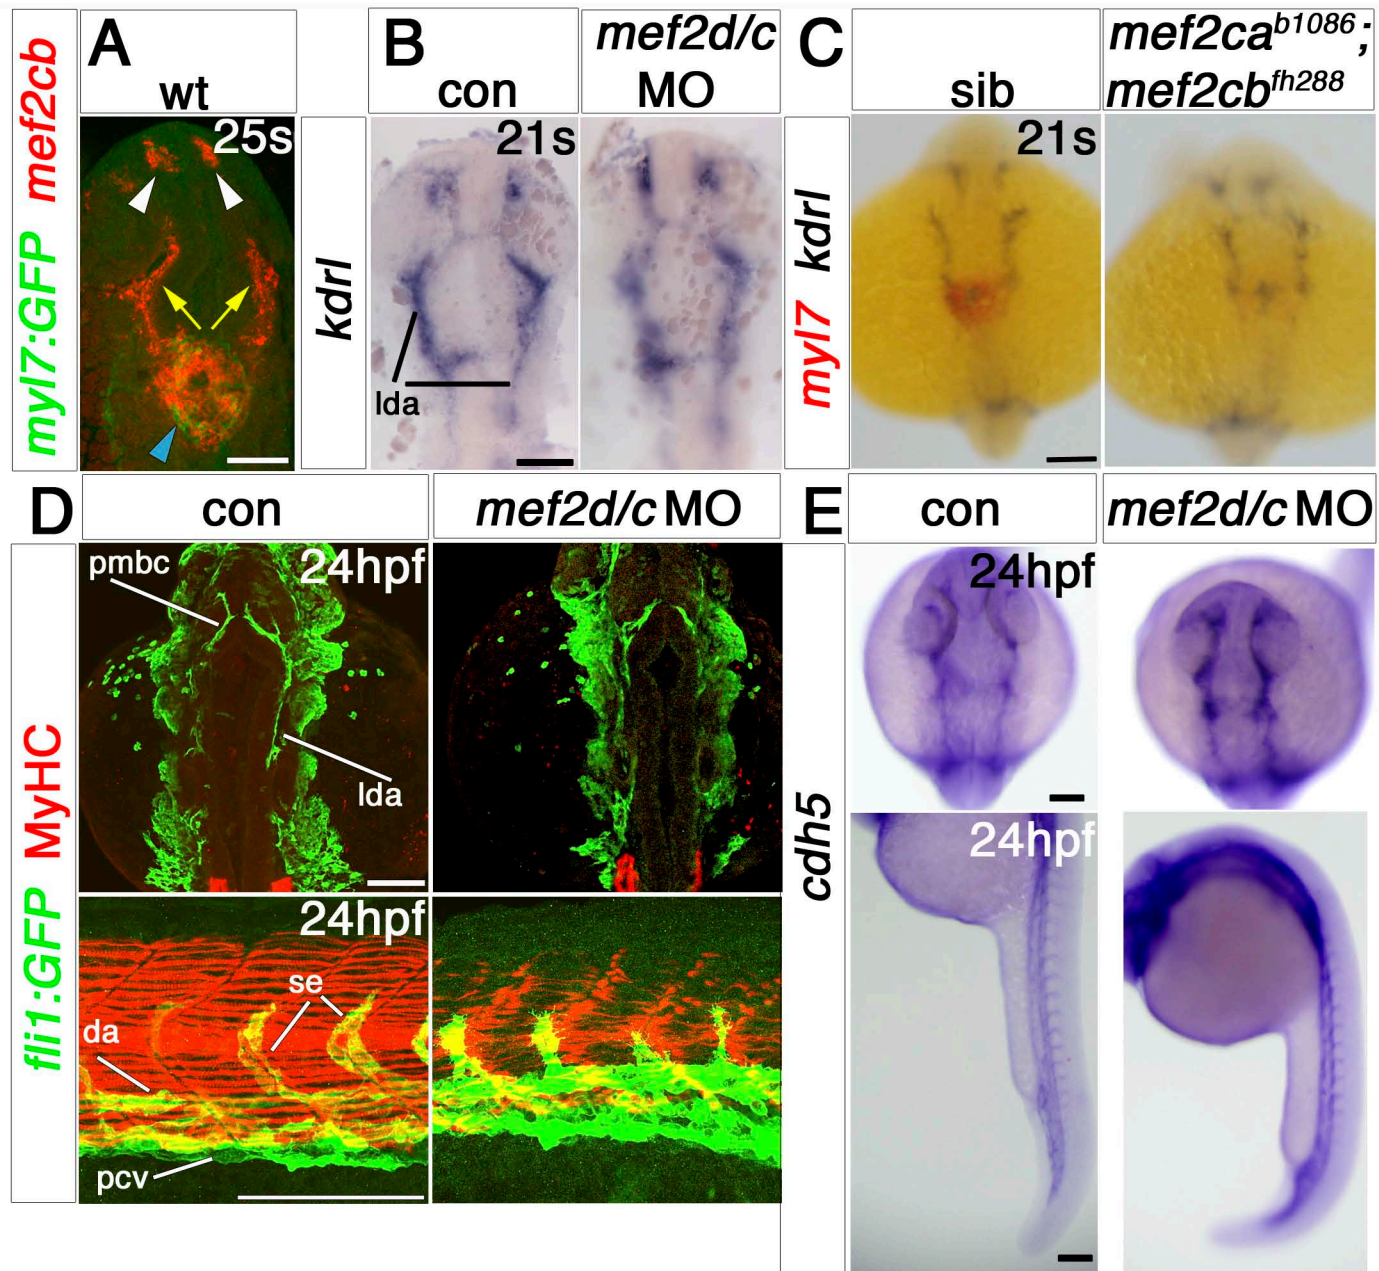

Fig. S5

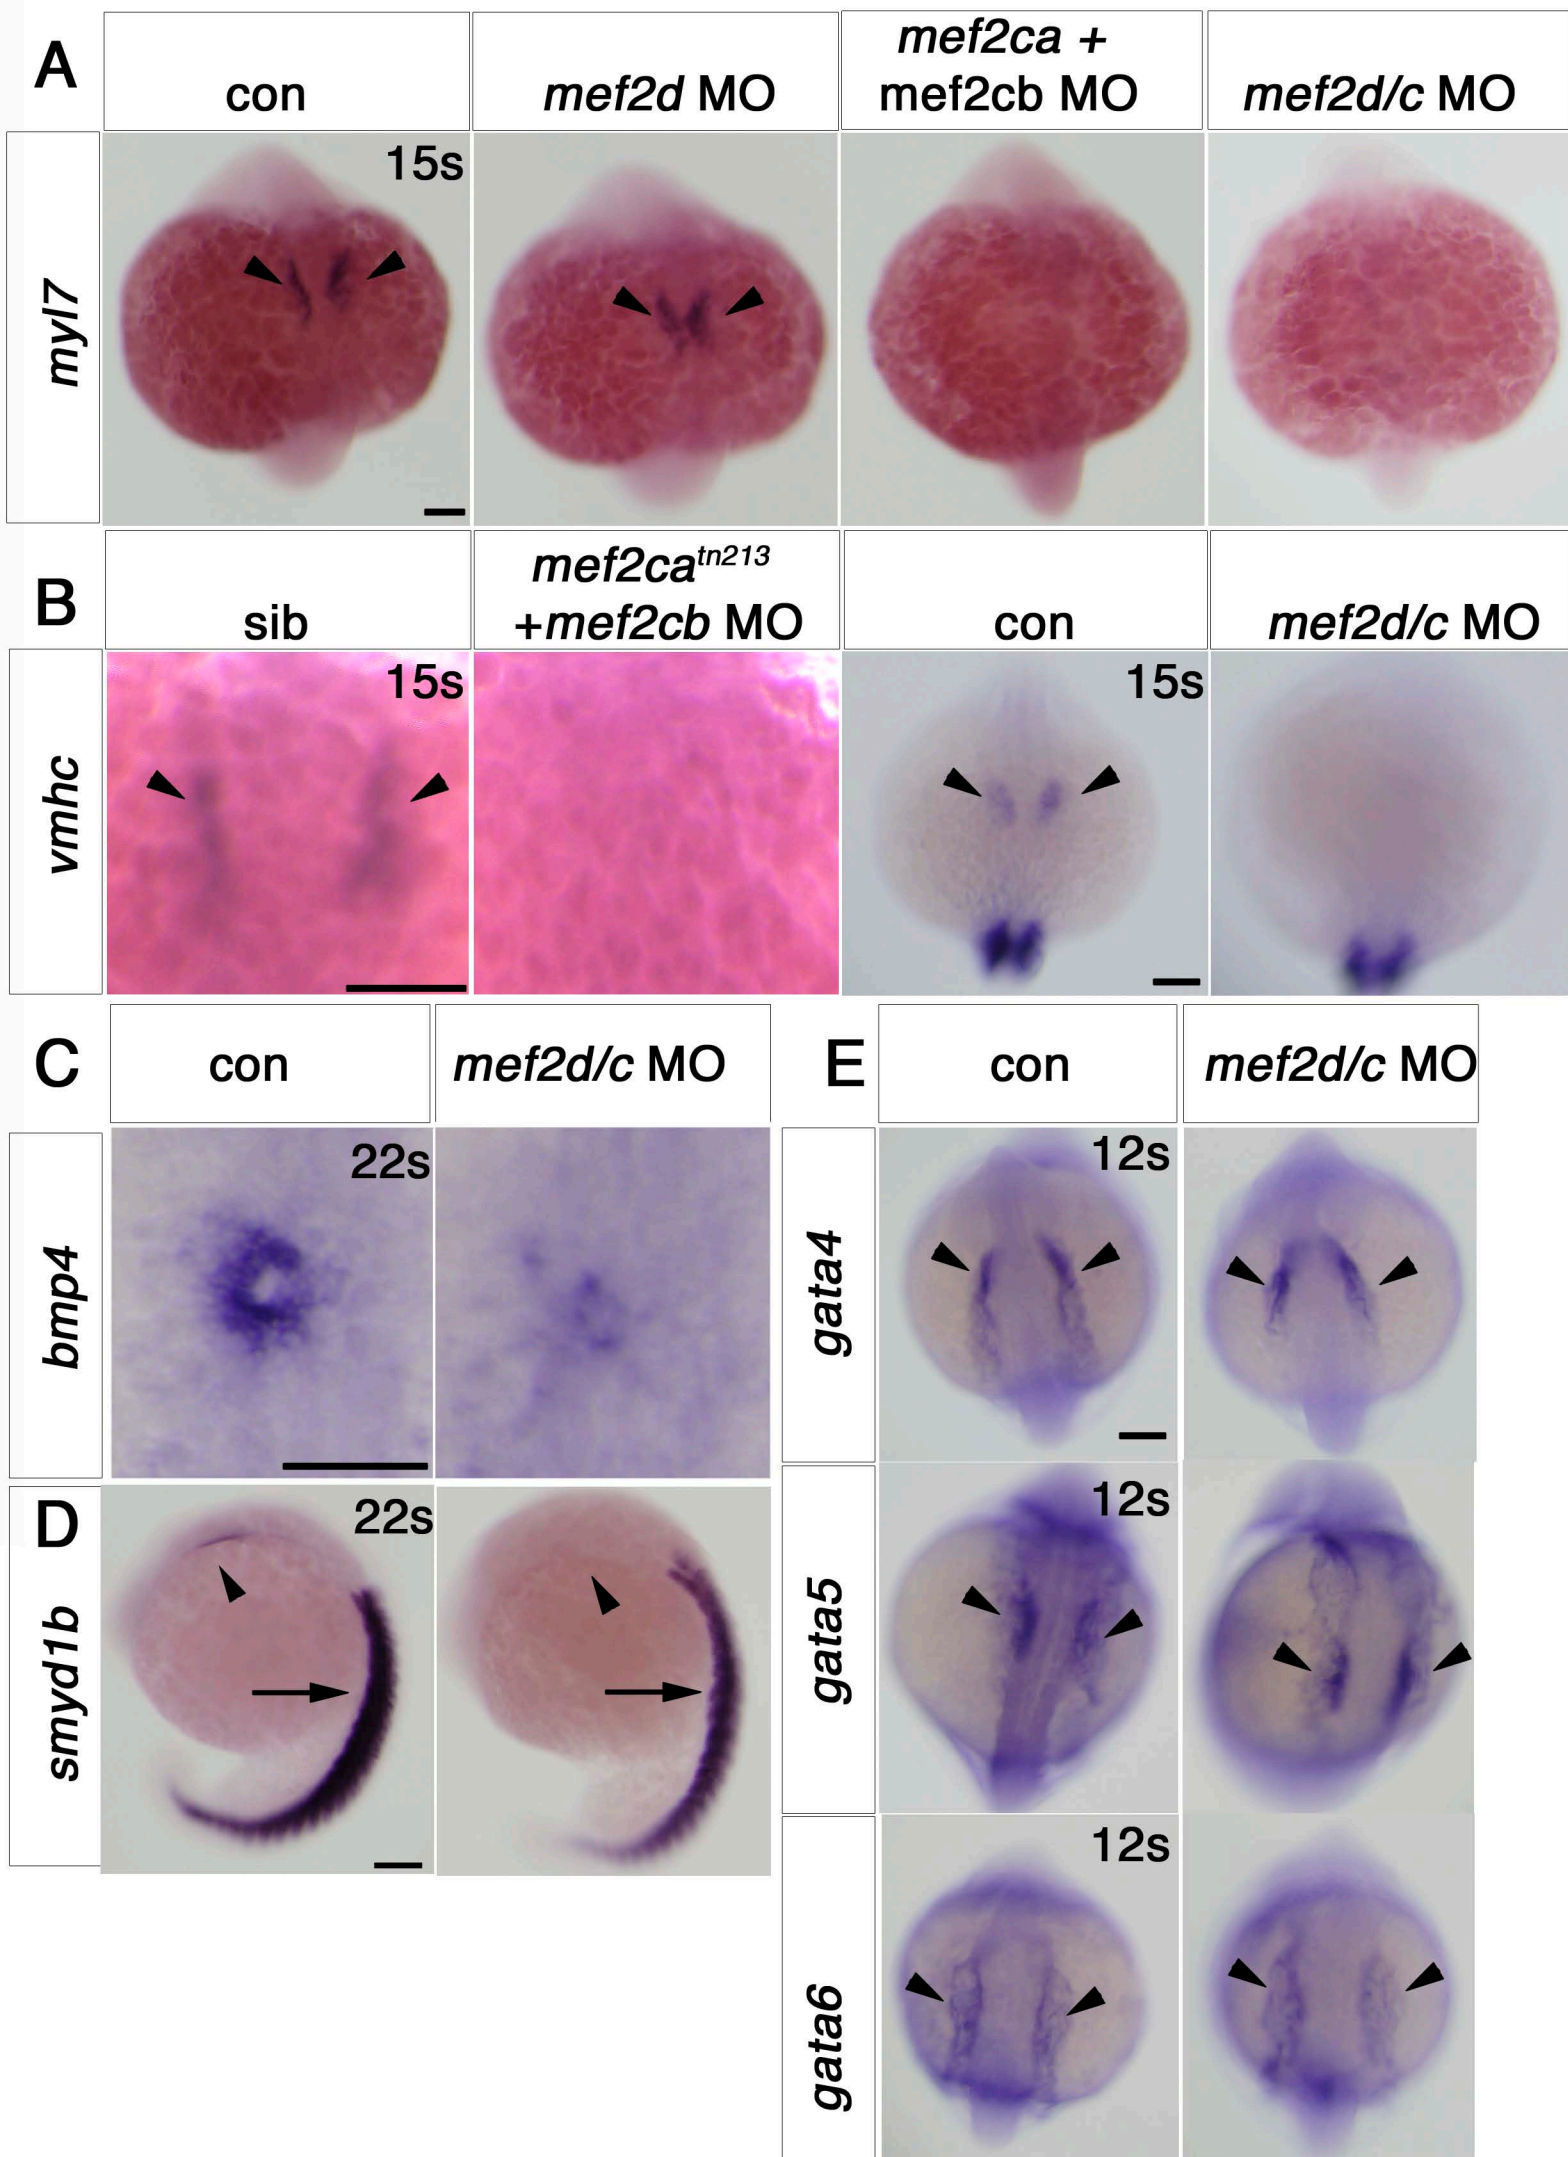



Fig. S6

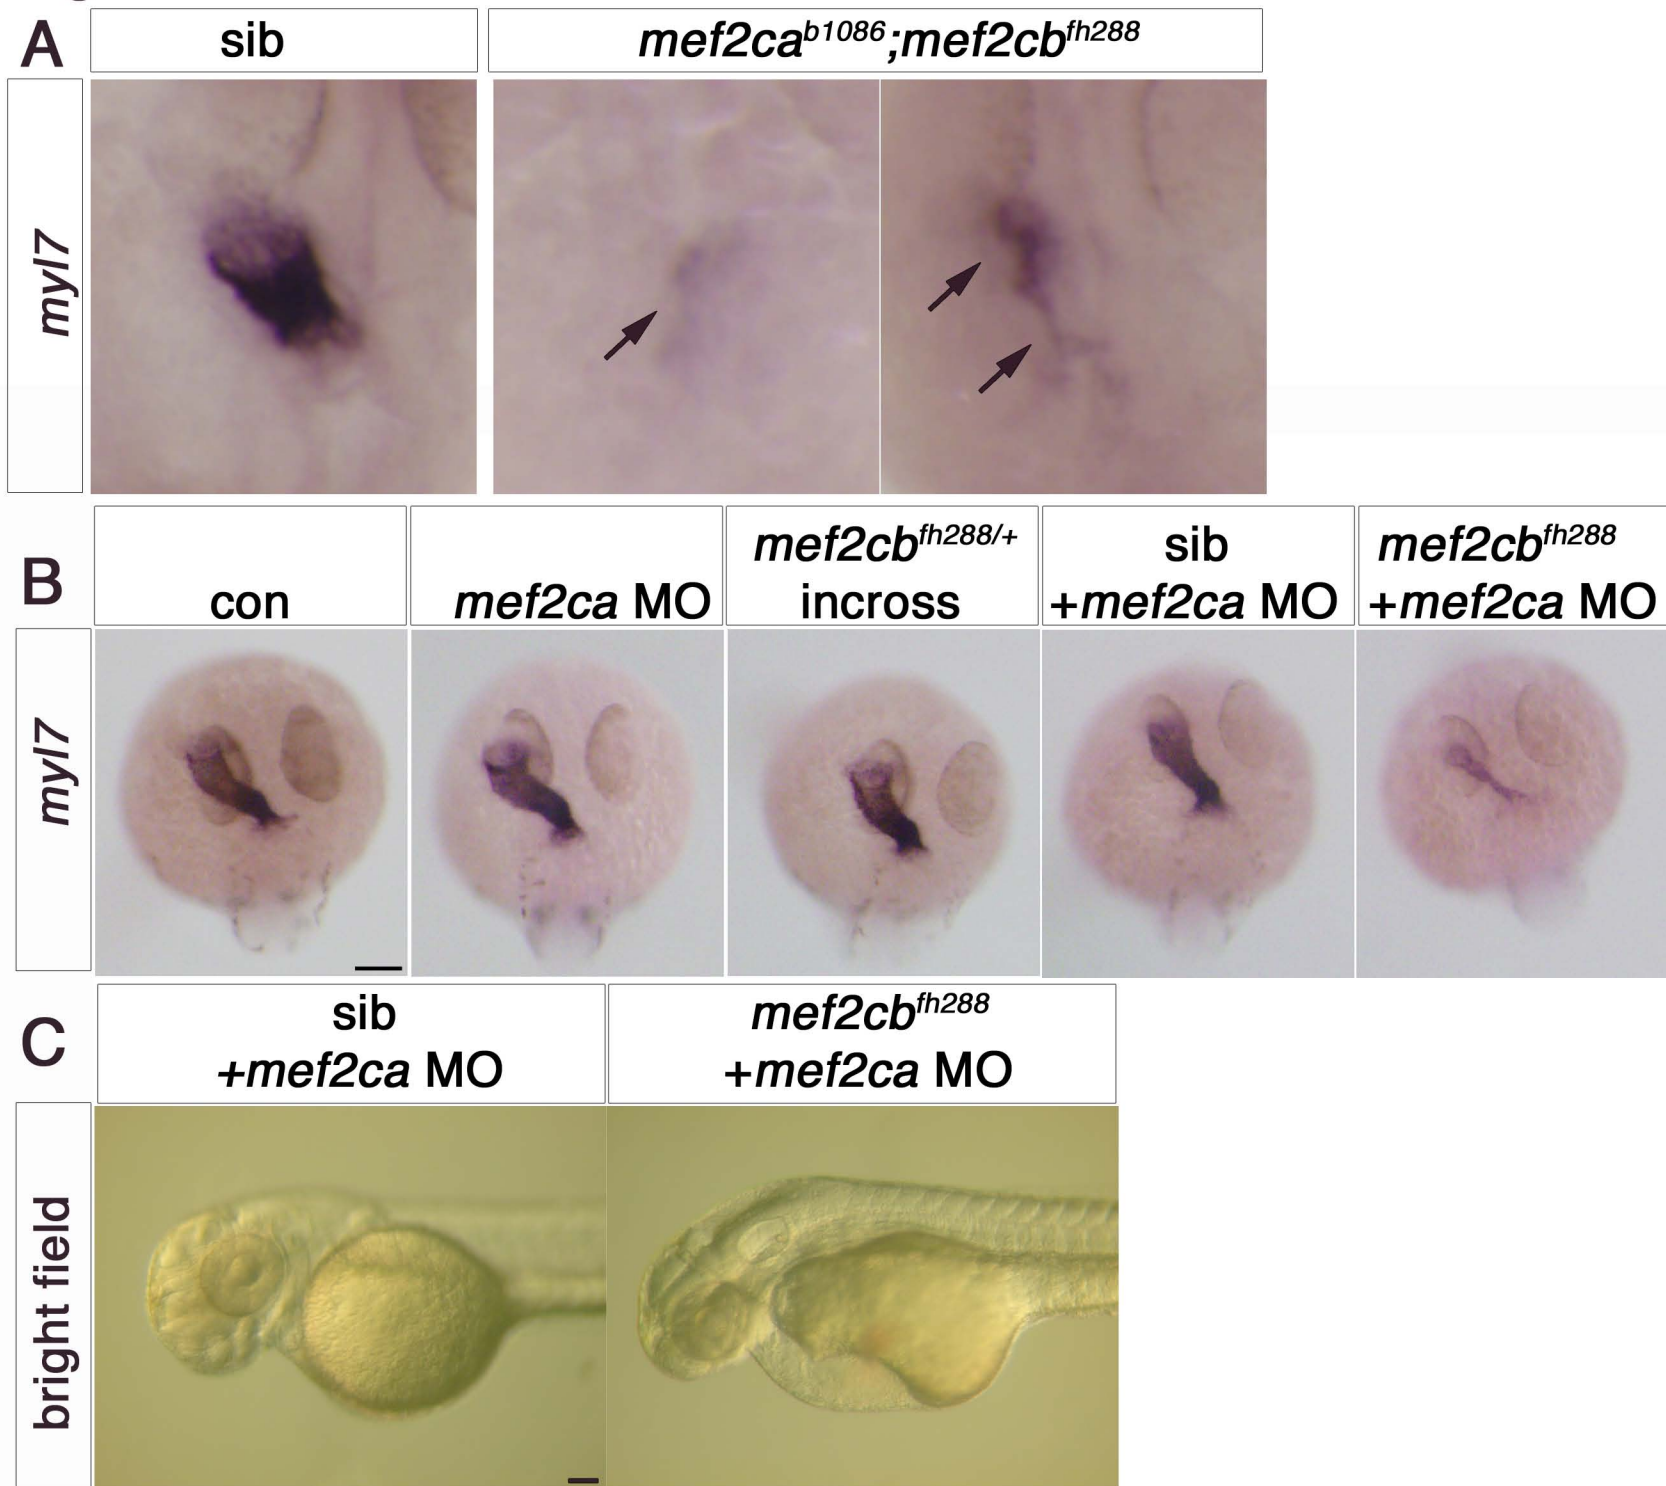

Fig. S7

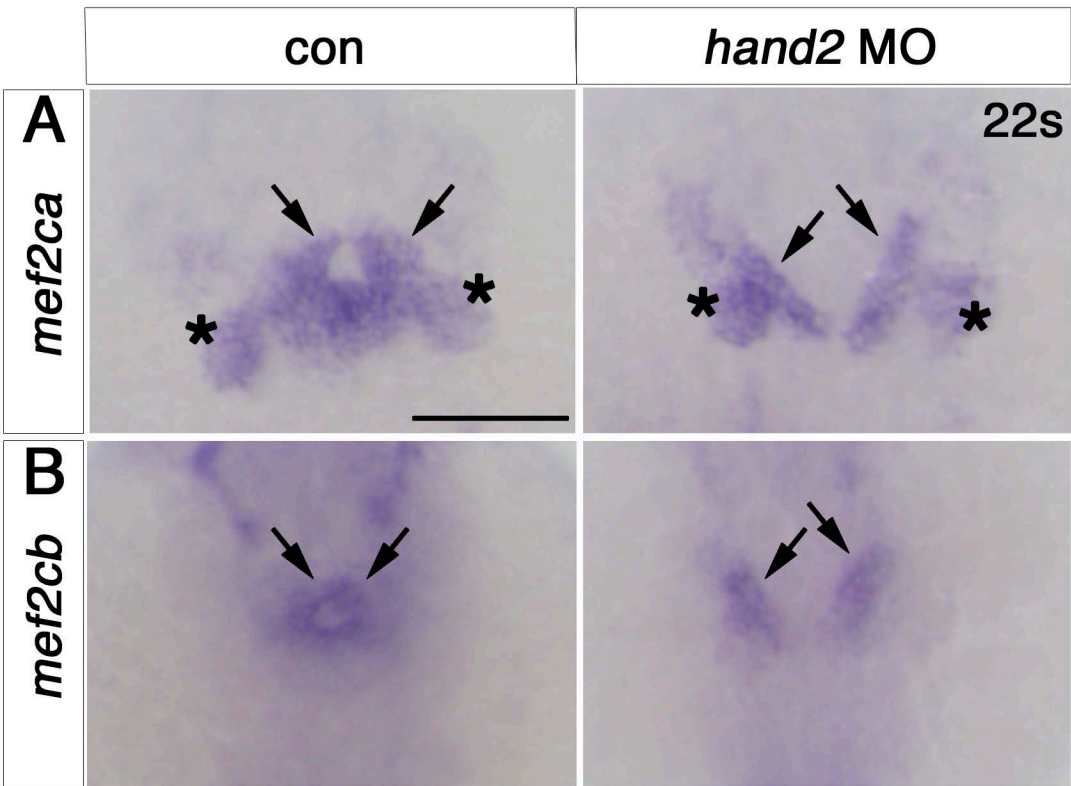

Fig. S8

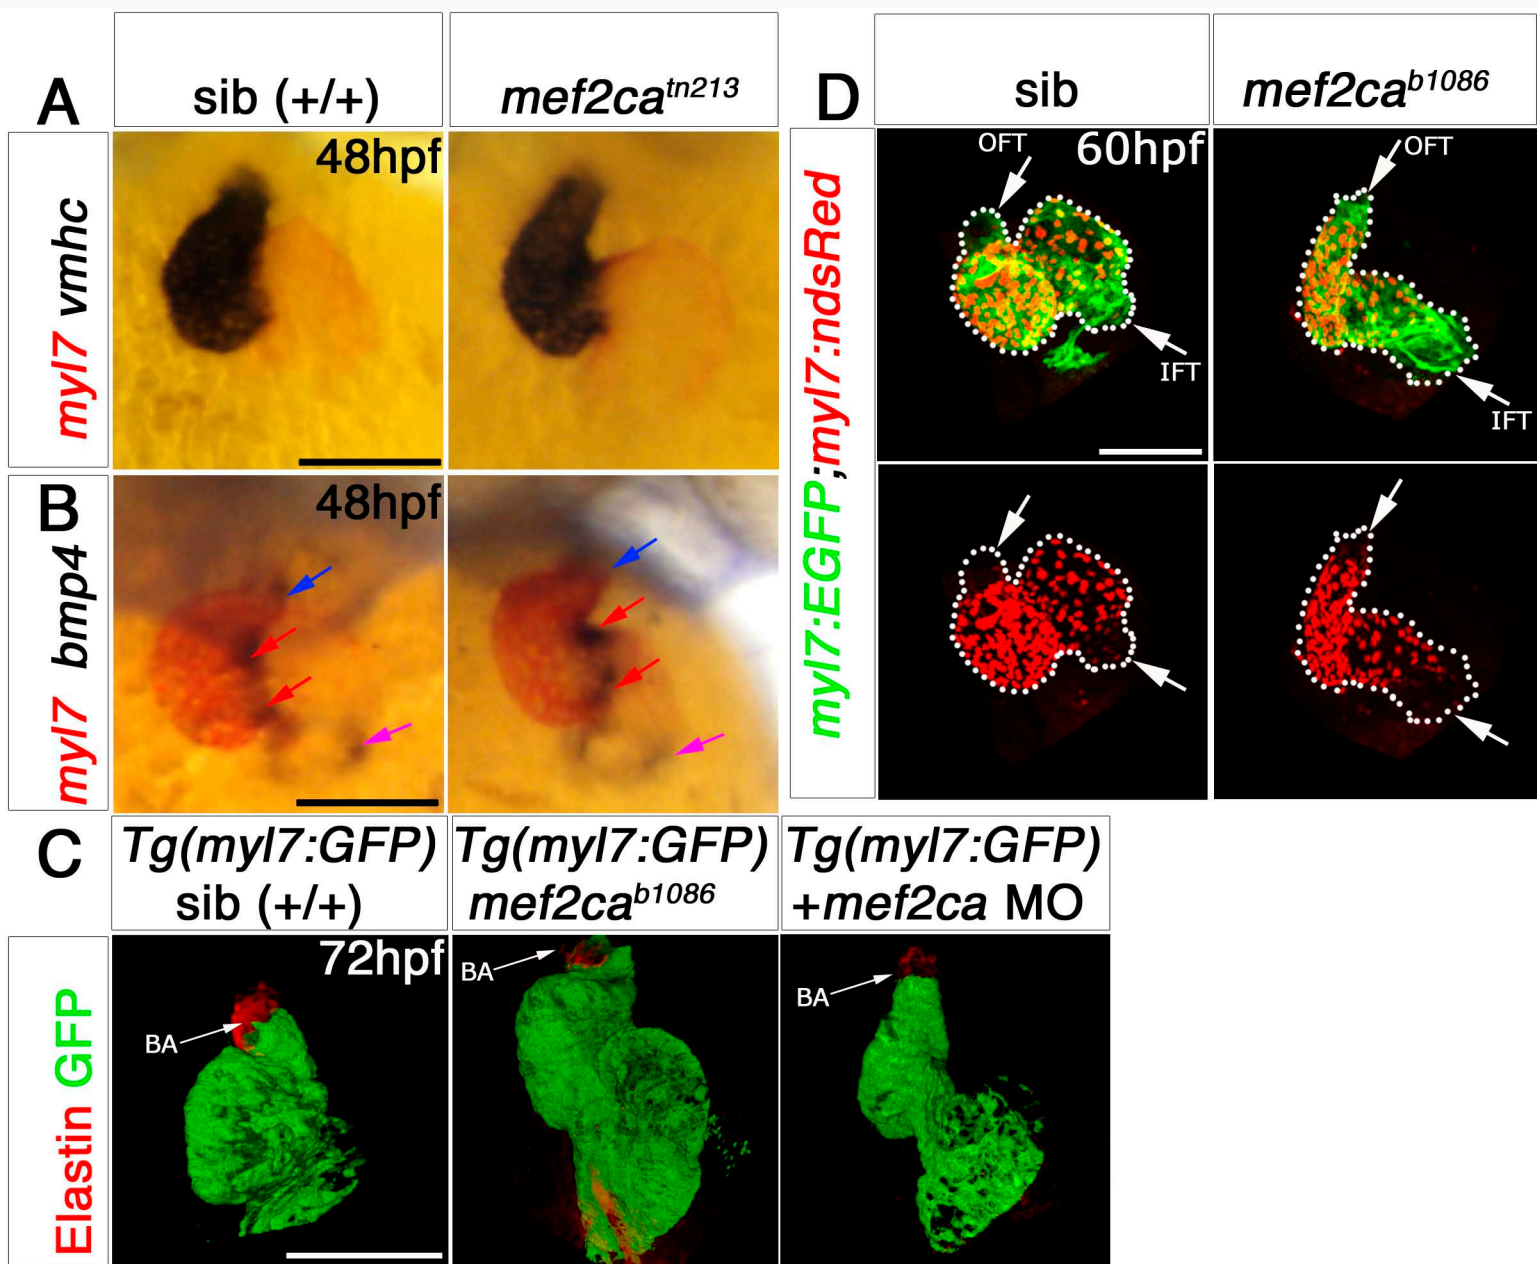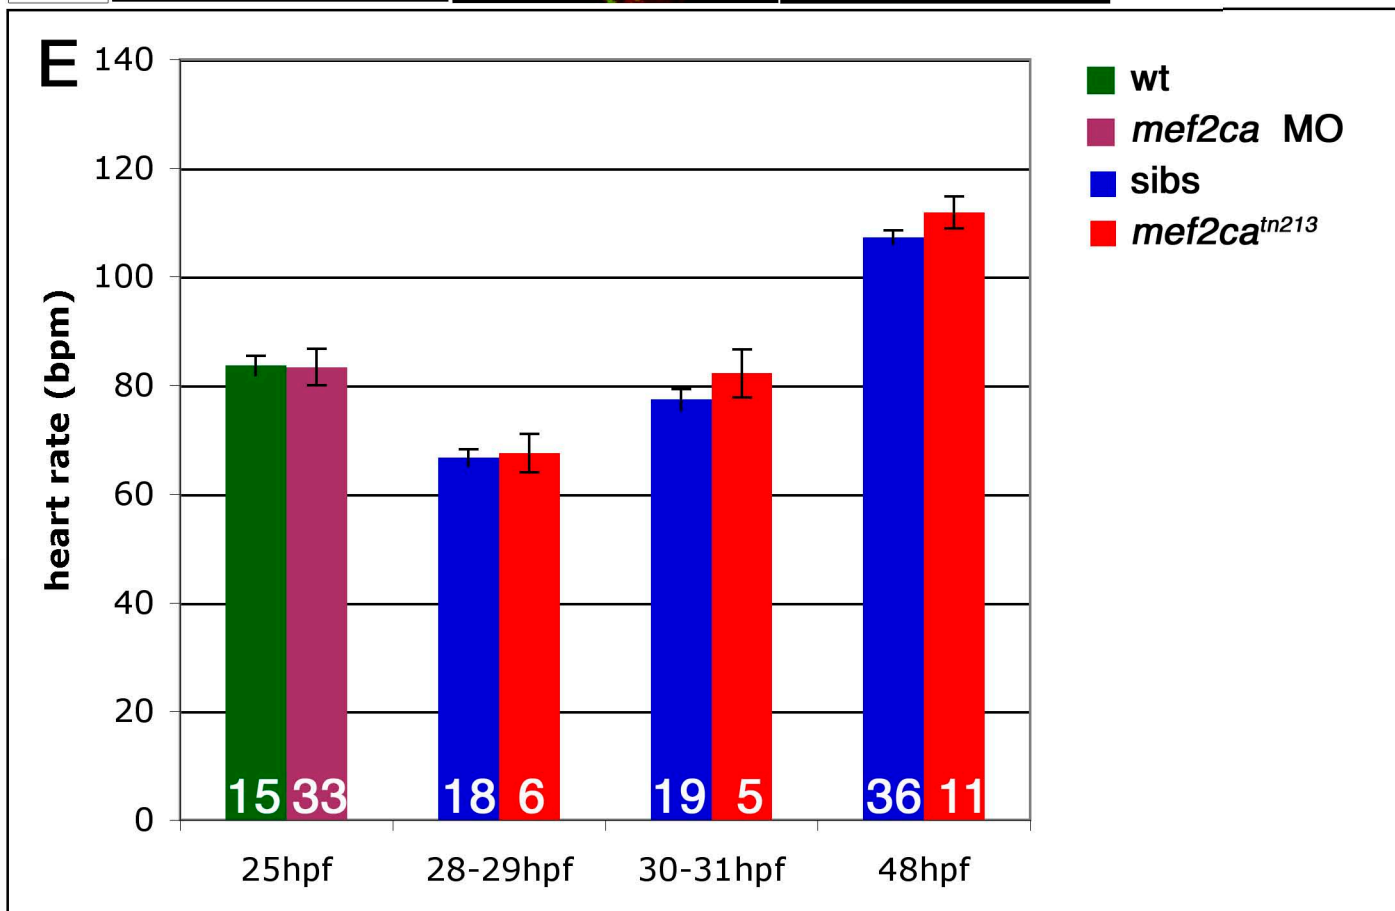



Fig. S9

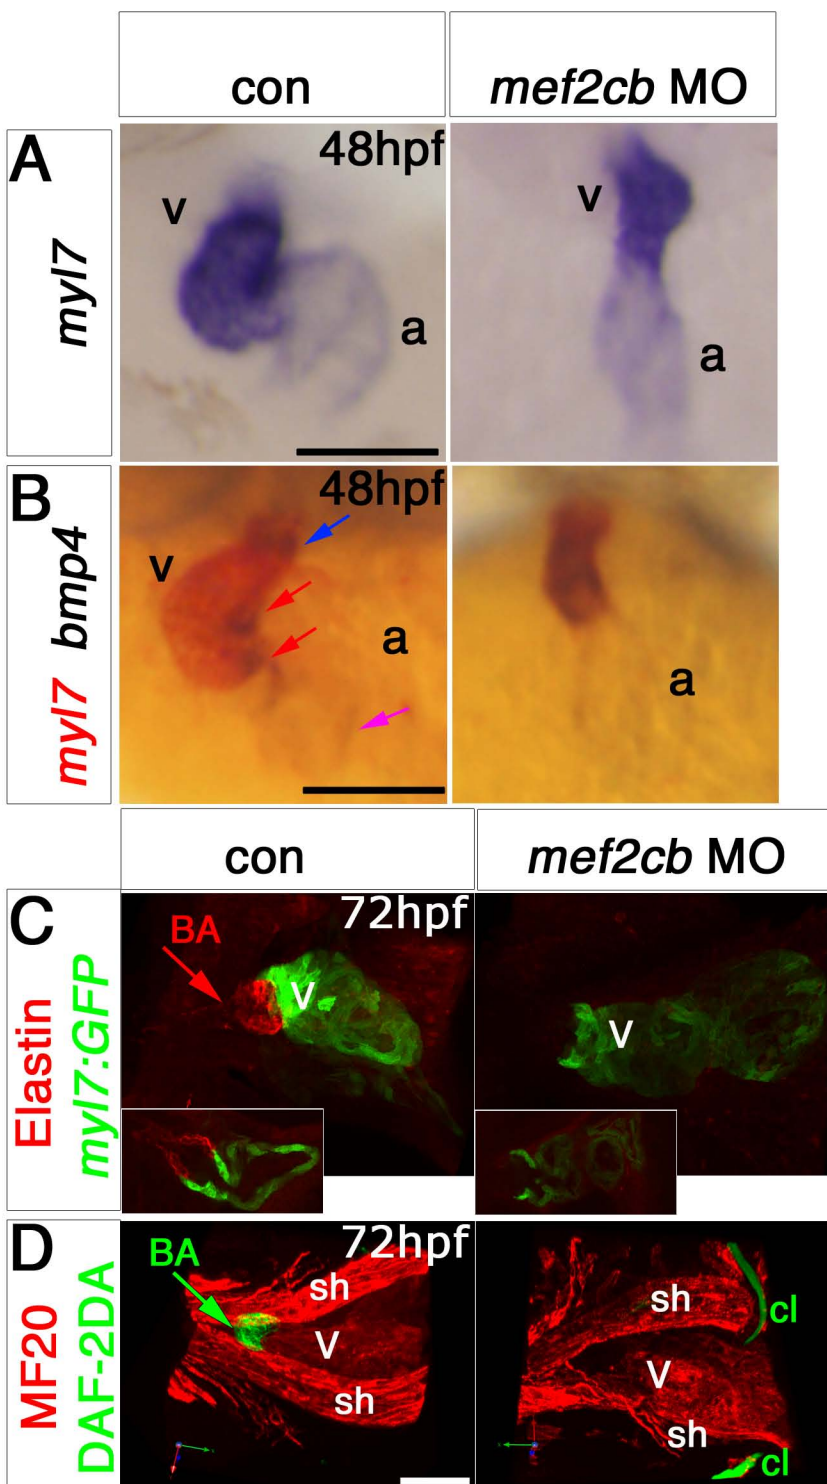

**Table S1 Quantification of effects of loss- and gain-of-function.**

| Fig. No.    |                                                          | con                                                                  | <i>mef2ca</i> MO                 | <i>mef2cb</i> MO                 | <i>mef2ca</i> + <i>mef2cb</i> MO | <i>mef2ca</i> <sup>+/h1086</sup> incross          | <i>mef2ca</i> <sup>+/h1086</sup> incross+ <i>mef2cb</i> MO | <i>mef2c</i> <sup>+/m213</sup> incross                                                                        | <i>mef2ca</i> <sup>+/m213</sup> incross+ <i>mef2cb</i> MO                                                                                    | <i>mef2d/c</i> MO                                      | <i>mef2d</i> MO | <i>mef2cb</i> <sup>+/h288</sup> incross            | <i>mef2cb</i> <sup>+/h288</sup> incross + <i>mef2ca</i> MO | <i>mef2ca</i> <sup>+/h1086</sup> ,<br><i>mef2cb</i> <sup>+/h288</sup> incross         |
|-------------|----------------------------------------------------------|----------------------------------------------------------------------|----------------------------------|----------------------------------|----------------------------------|---------------------------------------------------|------------------------------------------------------------|---------------------------------------------------------------------------------------------------------------|----------------------------------------------------------------------------------------------------------------------------------------------|--------------------------------------------------------|-----------------|----------------------------------------------------|------------------------------------------------------------|---------------------------------------------------------------------------------------|
| 2A-F, S5A   | <i>myl7</i> 15s                                          | 87/87 (100%) n                                                       | 11/41 (27%) n,<br>30/41 (73%) r  | 39/39 (100%) n                   | 7/17 (41%) n,<br>10/17 (59%) a   | 30/37 (81%) n,<br>7/37 (29%) r                    | 44/57 (77%) n,<br>13/57(23%) a                             | 30/45 (67%) n,<br>15/45 (33%) r,                                                                              |                                                                                                                                              | 5/27 (18%) sr,<br>22/27 (82%) a                        | 21/21 (100%) n  | 19/19 (100%) n                                     |                                                            | 58/62 (94%) n,<br>4/62(6%) a                                                          |
| 2A-F, S5B   | <i>vmhc</i> 15s                                          | 135/135 (100%) n                                                     |                                  | 42/42 (100%) n                   |                                  | 26/26 (100%) n                                    | 22/31 (71%) n,<br>9/31 (29%) a                             | 22/33 (66%) n,<br>11/33 (34%) r,                                                                              | 8/46 (17%) n,<br>22/46 (48%) r,<br>16/46 (35%) a                                                                                             | 4/65 (6%) n,<br>1/65 (2%) r,<br>60/65 (92%) a          |                 | 20/20 (100%) n                                     |                                                            | 79/86 (92%) n,<br>7/86 (8%) a                                                         |
| 2A-D        | <i>smyd1b</i> 13s                                        | 98/98 (100%) n                                                       |                                  | 65/65 (100%) n                   |                                  | 12/46 (26%) n,<br>23/46 (50%) r,<br>11/46 (24%) a | 49/64 (77%) n,<br>15/64 (23%) a                            | 7/31 (22%) n,<br>15/31 (48%) r,<br>9/31 (30%) a                                                               |                                                                                                                                              | 3/67 (4%) n, 2/67 (3%) r, 62/67 (93%) a (in heart)     |                 |                                                    |                                                            |                                                                                       |
| 2A-D        | <i>smyd1b</i> 17s                                        | 28/28 (100%) n                                                       |                                  | 25/25 (100%) n                   |                                  | 21/22 (95%) n,<br>1/22 (5%) r                     | 17/21 (81%) n,<br>4/21 (19%) a                             |                                                                                                               |                                                                                                                                              | 13/55 (24%) n, 16/55 (29%) r, 26/55 (47%) a (in heart) |                 |                                                    |                                                            |                                                                                       |
| 2G          | MyHC 24s                                                 |                                                                      |                                  |                                  |                                  |                                                   |                                                            |                                                                                                               |                                                                                                                                              |                                                        |                 |                                                    |                                                            | 94/107 (87%) n,<br>6/107 (6%) r,<br>7/107 (7%) a                                      |
| 3A-F        | MyHC 24 hpf                                              | 25/25 (100%) n                                                       |                                  | 8/26 (31%) n,<br>18/26 (69%) sm  |                                  |                                                   |                                                            | +/+ *: 10/12 (83%) n,<br>2/12(17%) r<br>+/m213*: 28/28 (100%) n<br>m213/m213*: 15/19 (79%) n,<br>4/19 (21%) r | +/+ *: 5/19 (26%) n,<br>14/19(84%) r<br>+/m213*: 9/35 (26%) n,<br>25/35 (71%) r,<br>1/35 (3%) a<br>m213/m213*: 1/17 (6%) n,<br>16/17 (94%) a |                                                        | 31/31 (100%) n  |                                                    | 74/80 (93%) n,<br>6/80 (7%) res                            |                                                                                       |
| 3A-F        | <i>bmp4</i> 24 hpf                                       | 23/23 (100%) n                                                       |                                  | 1/22 (4%) n,<br>21/22 (96%) sm   |                                  | 27/27 (100%)                                      | 16/23 (70%) sm,<br>7/23 (30%) a                            |                                                                                                               |                                                                                                                                              |                                                        |                 | 53/53 (100%) n                                     |                                                            | 83/88 (94%) n,<br>5/88 (6%) res                                                       |
| 3A-F, S6A,B | <i>myl7</i> + <i>vmhc</i> 24 hpf<br>or: <i>myl7</i> only | 122/128 (95%) n,<br>6/128 (5%) r<br><i>myl7</i> only: 48/48 (100%) n | <i>myl7</i> only: 56/56 (100%) n | 16/33 (48%) n,<br>17/33 (52%) sm |                                  | 49/49 (100%) n                                    | 3/59 (5%) n,<br>41/59 (69%) r,<br>15/59 (26%) a            |                                                                                                               |                                                                                                                                              | 3/36 (8%) n,<br>33/36 (92%) a                          |                 | 36/36 (100%) n<br><i>myl7</i> only: 78/78 (100%) n | <i>myl7</i> only: 58/80 (72%) n,<br>22/80 (28%) sr         | 83/86 (96%) n,<br>3/86 (4%) res<br><i>myl7</i> only: 71/79 (90%) n,<br>8/79 (10%) res |
| 3G          | <i>acta1b</i> 24 hpf                                     | 22/22 (100%) n                                                       |                                  |                                  |                                  |                                                   |                                                            |                                                                                                               |                                                                                                                                              | 4/28 (14%) n,<br>10/28 (36%) r,<br>14/28 (50%) a       |                 |                                                    |                                                            |                                                                                       |
| 3H          | <i>tnnc2</i> 24 hpf                                      | 25/25 (100%) n                                                       | 23/23 (100%) n                   |                                  |                                  |                                                   |                                                            |                                                                                                               |                                                                                                                                              | 3/25 (12%) n,<br>22/25 (30%) a                         | 24/24 (100%) n  |                                                    |                                                            |                                                                                       |
| 3I          | <i>mybpc1</i> 24 hpf                                     | 38/38 (100%) n                                                       |                                  |                                  |                                  |                                                   |                                                            |                                                                                                               |                                                                                                                                              | 6/41 (14%) n,<br>35/41 (86%)                           |                 |                                                    |                                                            |                                                                                       |
| 3J          | <i>nppa</i> 24 hpf                                       | 16/16 (100%) n                                                       |                                  |                                  |                                  |                                                   |                                                            |                                                                                                               |                                                                                                                                              | 5/21 (23%) n,<br>16/21 (77%) a                         |                 |                                                    |                                                            |                                                                                       |
| 4A, S6C     | Bright field 48-72 hpf                                   |                                                                      |                                  |                                  |                                  |                                                   |                                                            |                                                                                                               |                                                                                                                                              |                                                        |                 | 158/158 (100%) n                                   | 106/146 (73%) n,<br>40/146 (27%) a or res + edema,         | 642/694 (93%) n,<br>52/694 (7%) a or res + edema,                                     |
| 4B          | <i>myl7</i> + <i>vmhc</i> 48 hpf                         |                                                                      |                                  |                                  |                                  |                                                   |                                                            |                                                                                                               |                                                                                                                                              |                                                        |                 |                                                    |                                                            | 69/74 (93%) n,<br>5/74 (7%) res                                                       |
| 4C          | MyHC +Mef2, 50 hpf                                       |                                                                      |                                  |                                  |                                  |                                                   |                                                            |                                                                                                               |                                                                                                                                              |                                                        |                 |                                                    |                                                            | 80/83 (96%) n,<br>3/83 (4%) res                                                       |
| 4D          | MyHC (A4.1025); S46, 48 hpf                              | 15/15 (100%) n                                                       |                                  |                                  |                                  |                                                   |                                                            |                                                                                                               |                                                                                                                                              | 1/26 (4%) n,<br>6/26 (23%) sr,<br>19/26 (73%) a        |                 |                                                    |                                                            |                                                                                       |
| 4E          | <i>nppa</i> 48 hpf                                       |                                                                      |                                  |                                  |                                  |                                                   |                                                            |                                                                                                               |                                                                                                                                              |                                                        |                 |                                                    |                                                            | 52/55 (95%) n,<br>3/55 (5%) res                                                       |
| 4F          | <i>myl7</i> + <i>bmp4</i> 48 hpf                         |                                                                      |                                  |                                  |                                  |                                                   |                                                            |                                                                                                               |                                                                                                                                              |                                                        |                 |                                                    |                                                            | 46/50 (92%) n,<br>4/50 (8%) res                                                       |
| 4G          |                                                          |                                                                      |                                  |                                  |                                  |                                                   |                                                            |                                                                                                               |                                                                                                                                              |                                                        |                 |                                                    |                                                            | 73/78 (94%) n,<br>5/78 (6%) res                                                       |

| Fig. No. |                                    | con                | <i>mef2ca</i> MO                        | <i>mef2cb</i> MO                                                    | <i>mef2ca</i> + <i>mef2cb</i> MO         | <i>mef2ca</i> <sup>-/+h1086</sup> incross | <i>mef2ca</i> <sup>-/+h1086</sup> incross+ <i>mef2cb</i> MO | <i>mef2c</i> <sup>-/+h213</sup> incross                                      | <i>mef2ca</i> <sup>-/+h213</sup> incross+ <i>mef2cb</i> MO | <i>mef2d/c</i> MO                                                            | <i>mef2d</i> MO | <i>mef2cb</i> <sup>-/+h288</sup> incross | <i>mef2cb</i> <sup>-/+h288</sup> incross+ <i>mef2ca</i> MO | <i>mef2ca</i> <sup>-/+h1086</sup> ; <i>mef2cb</i> <sup>-/+h288</sup> incross |
|----------|------------------------------------|--------------------|-----------------------------------------|---------------------------------------------------------------------|------------------------------------------|-------------------------------------------|-------------------------------------------------------------|------------------------------------------------------------------------------|------------------------------------------------------------|------------------------------------------------------------------------------|-----------------|------------------------------------------|------------------------------------------------------------|------------------------------------------------------------------------------|
| 5A       | <i>nkx2.5</i> 12s                  | 27/27 (100%) n     |                                         |                                                                     | 22/22 (100%) n                           |                                           |                                                             |                                                                              |                                                            |                                                                              |                 |                                          |                                                            | 60/60 (100%) n                                                               |
| 5B       | <i>hand2</i> 12s                   | 16/16 (100%) n     |                                         |                                                                     | 24/24 (100%) n                           |                                           |                                                             |                                                                              |                                                            |                                                                              |                 |                                          |                                                            | 68/68 (100%) n                                                               |
| 5C       | <i>gata4</i> 12s                   | 20/20 (100%) n     |                                         |                                                                     | 27/27 (100%) n                           |                                           |                                                             |                                                                              |                                                            |                                                                              |                 |                                          |                                                            | 70/70 (100%) n                                                               |
| 5D       | <i>thx20</i> 22s                   | 13/13 (100%) n     |                                         |                                                                     |                                          |                                           |                                                             |                                                                              |                                                            | 22/22 (100%) n (but loss of ring shape)                                      |                 |                                          |                                                            |                                                                              |
| 5E       | <i>gata6</i> (± <i>myl7</i> ) 22s  | 22/22 (100%) n     |                                         |                                                                     |                                          |                                           |                                                             |                                                                              |                                                            | 3/26 (11%) n, 23/26 (89%) n (but loss of ring shape)                         |                 |                                          |                                                            | 57/61 (93%) n, 4/61 (7%) a <i>myl7</i> ; loss of ring shape <i>gata6</i>     |
| 5F       | <i>nkx2.5</i> (± <i>myl7</i> ) 22s | 46/46 (100%) n,    | 46/46 (100%) n                          | 15/40 (37%) n, 16/40 (40%) r, 9/40 (13%) sr                         |                                          |                                           |                                                             |                                                                              |                                                            | 8/57 (14%) n, 49/57 (86%) sr,                                                |                 |                                          |                                                            | 55/58 (95%) n, 3/58 (5%) a <i>myl7</i> ; res <i>nkx2.5</i>                   |
| 5G       | <i>hand2</i> 20-25s                | 15/15 (100%) n     |                                         |                                                                     |                                          |                                           |                                                             | 34/34 (100%) n                                                               | 13/49 (27%) n, 36/49 (73%) up                              | 16/16 (100%) up                                                              |                 |                                          |                                                            | 58/62 (94%) n, 4/62 (6%) up                                                  |
| 5H       | <i>cdh5;myl7</i> 22s               | 68/68 (100%) n     |                                         |                                                                     |                                          |                                           |                                                             |                                                                              |                                                            | 21/65 (32%) n, 44/65 (68%) sr or a <i>myl7</i> ; up and expanded <i>cdh5</i> |                 |                                          |                                                            | 79/85 (93%) n, 6/85 (7%) a <i>myl7</i> ; up and expanded <i>cdh5</i>         |
| 5I       | <i>cdh5;myl7</i> 48 hpf            |                    |                                         |                                                                     |                                          |                                           |                                                             |                                                                              |                                                            |                                                                              |                 |                                          |                                                            | 87/92 (95%) n, 5/92 (5%) res <i>myl7</i> ; up and expanded <i>cdh5</i>       |
|          |                                    | con                | <i>mef2cb</i> BAC DNA                   | <i>mef2cb</i> mRNA                                                  | <i>mef2cb</i> <sup>-/+h288</sup> incross |                                           |                                                             |                                                                              |                                                            |                                                                              |                 |                                          |                                                            |                                                                              |
| 6A, S1G  | MyHC; <i>Mef2ca/cb</i> 24 hpf      | 20/20 (100%) n     |                                         | 5/22 (22%) n, 17/22 (78%) up+ectopic                                |                                          |                                           |                                                             |                                                                              |                                                            |                                                                              |                 |                                          |                                                            |                                                                              |
| 6B       | <i>smyd1b</i> 24 hpf               | 25/25 (100%) n     |                                         | 5/23 (22%) n, 18/23 (78%) up+ectopic                                |                                          |                                           |                                                             |                                                                              |                                                            |                                                                              |                 |                                          |                                                            |                                                                              |
| 6C       | <i>bmp4</i> 24 hpf                 | 19/19 (100%) n     |                                         | 13/37 (35%) n, 24/37 (65%) up (in cardiac region)                   |                                          |                                           |                                                             |                                                                              |                                                            |                                                                              |                 |                                          |                                                            |                                                                              |
| 6D       | <i>myod;myl7</i> 14s               | 9/9 (100%) n       |                                         | 5/22 (23%) n, 17/22 (77%) ectopic <i>myod</i> , no <i>myl7</i>      |                                          |                                           |                                                             |                                                                              |                                                            |                                                                              |                 |                                          |                                                            |                                                                              |
| 6E       | <i>myod;myl7</i> 24s               | 11/11 (100%) n     |                                         | 5/16 (31%) n, 10/16 (78%) ectopic <i>myod</i> , reduced <i>myl7</i> |                                          |                                           |                                                             |                                                                              |                                                            |                                                                              |                 |                                          |                                                            |                                                                              |
| 6F       | <i>myl7;cdh5</i> 24s               | 14/14 (100%) n     |                                         | 5/24 (21%) n, 19/24 (79%) reduced <i>myl7</i> reduced <i>cdh5</i>   |                                          |                                           |                                                             |                                                                              |                                                            |                                                                              |                 |                                          |                                                            |                                                                              |
| 6G       | <i>myl7</i> 24 hpf                 | 24/24 (100%) n     | 24/41 (58%) n, 17/41 (42%) ect          |                                                                     |                                          |                                           |                                                             |                                                                              |                                                            |                                                                              |                 |                                          |                                                            |                                                                              |
| 7A       | <i>myl7+vmhc</i> , 50 hpf          |                    |                                         |                                                                     | 51/51 (100%) n; 12 genotyped             |                                           |                                                             |                                                                              |                                                            |                                                                              |                 |                                          |                                                            |                                                                              |
| 7B       | <i>bmp4</i> 48 hpf                 |                    |                                         |                                                                     | 42/42 (100%) n; 12 genotyped             |                                           |                                                             |                                                                              |                                                            |                                                                              |                 |                                          |                                                            |                                                                              |
| 7C       | Zn-5+Elastin, 72 hpf               |                    |                                         |                                                                     | 38/38 (100%) n; 12 genotyped             |                                           |                                                             |                                                                              |                                                            |                                                                              |                 |                                          |                                                            |                                                                              |
| S1A-D    | <i>mef2cb</i> 24 hpf               |                    | 25/34 (73%) up in chimeric distribution |                                                                     |                                          |                                           |                                                             |                                                                              |                                                            |                                                                              |                 |                                          |                                                            |                                                                              |
|          |                                    | con                | <i>mef2cb</i> MO                        | <i>mef2ca</i> <sup>h1086</sup> incross                              | <i>mef2d/c</i> MO                        | <i>mef2ca</i> <sup>h213</sup> incross     | <i>hand2</i> MO                                             | <i>mef2ca</i> <sup>-/+h1086</sup> ; <i>mef2cb</i> <sup>-/+h288</sup> incross |                                                            |                                                                              |                 |                                          |                                                            |                                                                              |
| S2B,C    | <i>Mef2ca/cb</i>                   |                    |                                         | 29/38 (76%) n 9/38 (24%) a (somite), sr (heart)                     |                                          |                                           |                                                             |                                                                              |                                                            |                                                                              |                 |                                          |                                                            |                                                                              |
| S4B      | <i>kdr1</i> (± <i>myl7</i> ) 21s   | 16/16 (100%) n     |                                         |                                                                     | 29/29 (100%) n                           |                                           |                                                             | 41/44 (93%) n, 3/44 (7%) a <i>myl7</i> ; n <i>kdr1</i>                       |                                                            |                                                                              |                 |                                          |                                                            |                                                                              |
| S4D      | <i>flil:GFP</i> 24 hpf             | 23/23 (100%) n     |                                         |                                                                     | 18/18 (100%) n (heart region)            |                                           |                                                             |                                                                              |                                                            |                                                                              |                 |                                          |                                                            |                                                                              |
| S4E      | <i>cdh5</i> 24 hpf                 | 26/26 (100%) n     |                                         |                                                                     | 6/21 (27%) n, 15/21 (73%) up             |                                           |                                                             |                                                                              |                                                            |                                                                              |                 |                                          |                                                            |                                                                              |
| S5A      | <i>myl7</i> 15s                    | See entry for 2A-F |                                         |                                                                     |                                          |                                           |                                                             |                                                                              |                                                            |                                                                              |                 |                                          |                                                            |                                                                              |



| S5B         | <i>vmhc</i><br>15s                               | See entry for 2A-F                                                              |                                                    |                                                 |                                                    |                                                         |                                    |                                                                           |
|-------------|--------------------------------------------------|---------------------------------------------------------------------------------|----------------------------------------------------|-------------------------------------------------|----------------------------------------------------|---------------------------------------------------------|------------------------------------|---------------------------------------------------------------------------|
|             |                                                  | con                                                                             | <i>mef2cb</i> MO                                   | <i>mef2ca</i> <sup>b1086</sup> incross          | <i>mef2d/c</i> MO                                  | <i>mef2ca</i> <sup>m213</sup> incross                   | <i>hand2</i> MO                    | <i>mef2ca</i> <sup>+b1086</sup> ; <i>mef2cb</i> <sup>-fh288</sup> incross |
| S5C         | <i>bmp4</i><br>22s                               | 35/35<br>(100%) n                                                               |                                                    |                                                 | 15/79 (19%) n,<br>19/79 (24%) r,<br>45/79 (57%) sr |                                                         |                                    |                                                                           |
| S5D         | <i>smyd1b</i><br>22s                             | 41/41<br>(100%) n                                                               |                                                    |                                                 | 36/36 (100%) a                                     |                                                         |                                    |                                                                           |
| S5E         | <i>gata4</i><br>12s                              | 21/21<br>(100%) n                                                               |                                                    |                                                 | 35/35 (100%) n                                     |                                                         |                                    |                                                                           |
| S5E         | <i>gata5</i><br>12s                              | 26/26<br>(100%) n                                                               |                                                    |                                                 | 26/26 (100%) n                                     |                                                         |                                    |                                                                           |
| S5E         | <i>gata6</i><br>12s                              | 24/24<br>(100%) n                                                               |                                                    |                                                 | 24/24 (100%) n                                     |                                                         |                                    |                                                                           |
| S6A,B       | <i>myl7</i><br>24 hpf                            | See entry for 3A-F                                                              |                                                    |                                                 |                                                    |                                                         |                                    |                                                                           |
| S6C         | Bright field<br>phenotype                        | See entry for 4A                                                                |                                                    |                                                 |                                                    |                                                         |                                    |                                                                           |
| S7A         | <i>mef2ca</i><br>22s                             | 23/23<br>(100%) n                                                               |                                                    |                                                 |                                                    |                                                         | 18/19 (94%) cb (nl)<br>1/19 (6%) n |                                                                           |
| S7B         | <i>mef2cb</i><br>22s                             | 31/31<br>(100%) n                                                               |                                                    |                                                 |                                                    |                                                         | 23/24 (96%) cb (nl)<br>1/24 (4%) n |                                                                           |
| S8A         | <i>myl7+vmhc</i><br>48 hpf                       |                                                                                 |                                                    |                                                 |                                                    | 29/29 (100%) n**                                        |                                    |                                                                           |
| S8B         | <i>myl7+bmp4</i><br>48 hpf                       |                                                                                 |                                                    |                                                 |                                                    | 36/36 (100%) n**                                        |                                    |                                                                           |
| S8A         | <i>smyd1b</i><br>24 hpf                          | 53/53<br>(100%) n                                                               | 5/32 (15%) n,<br>27/32 (85%) sm,<br>up             |                                                 |                                                    |                                                         |                                    |                                                                           |
| S9A         | <i>myl7</i><br>48 hpf                            | 25/25<br>(100%) n                                                               | 7/77 (9%) 70/77<br>(91%) small,<br>unlooped heart  |                                                 |                                                    |                                                         |                                    |                                                                           |
| S9B         | <i>bmp4</i><br>48 hpf                            | 24/24<br>(100%) n                                                               | 7/48 (15%) n,<br>41/48 (85%) up,<br>unlooped heart |                                                 |                                                    |                                                         |                                    |                                                                           |
| S9D         | MF20; DAF-2DA<br>72 hpf                          | 12/12<br>(100%) n                                                               | 2/14 (14%) n,<br>12/14 (86%) a                     |                                                 |                                                    |                                                         |                                    |                                                                           |
|             |                                                  | <i>mef2ca</i> <sup>b1086</sup> ;<br><i>Tg(myl7:GFP</i> ;<br><i>myl7:ndsRed)</i> | <i>Tg (myl7:GFP)</i>                               | <i>Tg (myl7:GFP)</i><br>+ <i>mef2cb</i> MO      | <i>Tg (myl7:GFP)</i> +<br><i>mef2ca</i> MO         | <i>mef2ca</i> <sup>b1086</sup> ;<br><i>Tg(myl7:GFP)</i> |                                    |                                                                           |
| S8C,<br>S9C | <i>myl7:GFP</i> ;<br>Elastin, 72 hpf             |                                                                                 | 12/12 (100%) n                                     | 3/15 (20%) n,<br>2/15 (43%) r,<br>10/15 (67%) a | 8/10 (80%) n<br>2/10 (20%) r                       | 12/12 (100%) n**                                        |                                    |                                                                           |
| S8D         | <i>myl7:GFP</i> ;<br><i>myl7:ndsRed</i> , 60 hpf | 21/21 (100%)<br>n**                                                             |                                                    |                                                 |                                                    |                                                         |                                    |                                                                           |

Fraction of embryos showing normal, or any deviated effect of mRNA expression, protein immunodetection or marker at the indicated stages.

Abbreviations: n, normal, ab, abnormal, r, reduced, sr, strongly reduced, res, absent except for a few residual cells, up, upregulated, a, absent, sm, small heart, cb, cardia bifida, nl, normal levels

\* genotype verified by Mef2C immunostaining.

\*\* Results verified by sequence genotyping.
